# Supplementary material
Source: Springer Nature journal article supplement (https://www.springermedizin.de/resource/supplementary/13601_2013_656_MOESM8_ESM.pdf/9678650)

A

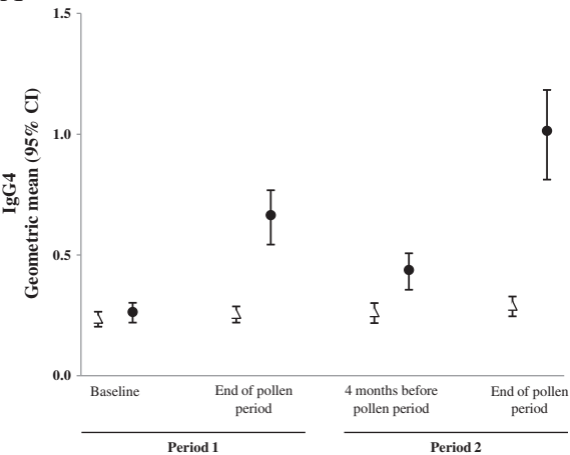

B

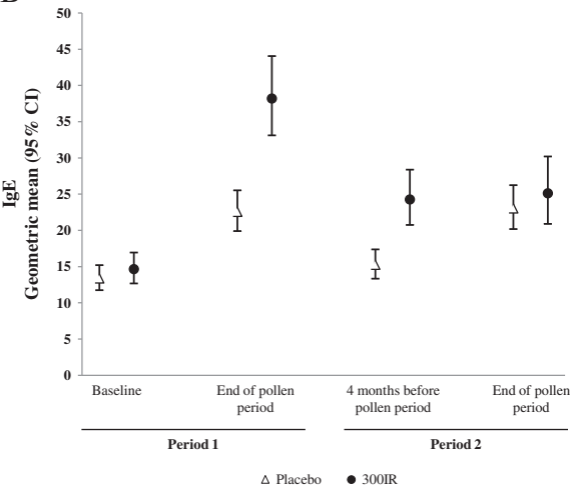

Supplement: MOESM8 [file 9678650]
